# Supplementary material
Source: PubMed Central journal article supplement (PMC3737245)
Supplement: NIHMS478286-supplement-supplement_1.pdf [file NIHMS478286-supplement-supplement_1.pdf]

# Supplementary Figure S1

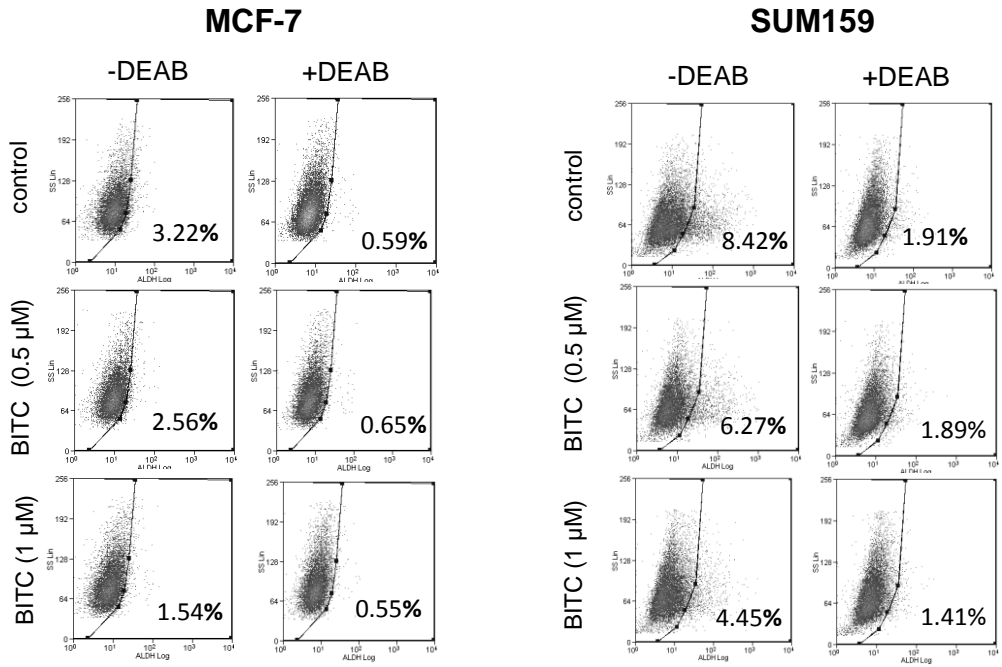

**Legend for supplementary figures**

**Fig. S1.** Representative flow histograms depicting ALDH1+ population in MCF-7 and SUM159 cells after 3 days of treatment with DMSO or BITC (0.5 and 1  $\mu$ M). The ALDH inhibitor DEAB was used as a control.
